# Supplementary material
Source: publisher site journal article supplement (https://www.dovepress.com/get_supplementary_file.php?f=322506.xlsx)
Supplement: Supplementary file 1 [file get_supplementary_file.php]

## Sheet: Suppl. Table 1, reliability
Supplementary Table 1: Detailed Dataextraction sheet for the reliability studies of all settings Abbreviations; CI : confidence interval, CV coefficient of variation, ICC: Intraclass correlation coefficient agreement, LoA: limits of agreement, MDC95: minimal detectable change 95, MDC95_perc: minimal detectable change 95 %, MDC90: minimal detectable change 90, MDC90_perc: minimal detectable change…
Author	Year	Setting	N	Test	Quality assessment COSMIN RoB	Reliability criteria for good measurement properties	ICC	ICC_CI_lower_bound	ICC_CI_upper_bound	ICC_Model	Test_Retest1_Inter_Tester	Trial_nr	Time_between_trials	SEM	SEM_perc	CVSEM	LoA_lower_bound	LoA_upper_bound	Bland_Altmann_bias	CV	MDC95	MDC90	MDC95_perc	MDC90_perc	Minimal Important Change	Minimal Detectable Change
André	2016	Community-dwelling	12	CALF RAISE SENIOR	doubtful	+	0.84	0.72	0.97	2.1	Inter-Rater	2	Consecutive												3.5	4.6
André	2016	Community-dwelling	41	CALF RAISE SENIOR	doubtful	+	0.903	0.824	0.947	2.1	Intra-Rater		Consecutive	1.8			-7.5072	9.4272	0.96						3.5	4.6
Anson	2017	Community-dwelling	55	BEST	doubtful	+	0.86	0.77	0.92	2.1	Intra-Rater		4weeks	3.2							8.9
Anson	2017	Community-dwelling	55	MINI BEST	doubtful	+	0.84	0.73	0.9	2.1	Intra-Rater		4weeks	1.4							4
Arnold	2010	Community-dwelling	18	DYNAMOMETER HIP FLEX SITTING	adequate	+	0.845	0.63	0.94	Two way mixed model with absolute agreement	Inter-Rater		Consecutive	1.57							4.35182
Arnold	2010	Community-dwelling	18	DYNAMOMETER HIP FLEX STANDING	adequate	+	0.85	0.64	0.94	Two way mixed model with absolute agreement	Inter-Rater		Consecutive	1.42							3.93604
Arnold	2010	Community-dwelling	18	DYNAMOMETER HIP ABD SUPINE	adequate	+	0.845	0.63	0.94	Two way mixed model with absolute agreement	Inter-Rater		Consecutive	1.375							3.81131
Arnold	2010	Community-dwelling	18	DYNAMOMETER HIP ABD STANDING	adequate	+	0.915	0.79	0.97	Two way mixed model with absolute agreement	Inter-Rater		Consecutive	1.135							3.14606
Arnold	2010	Community-dwelling	18	DYNAMOMETER KNEE EXT 45°	adequate	+	0.825	0.59	0.93	Two way mixed model with absolute agreement	Inter-Rater		Consecutive	1.84							5.10022
Arnold	2010	Community-dwelling	18	DYNAMOMETER DORSIFLEX SITTING	adequate	-	0.55	0.13	0.8	Two way mixed model with absolute agreement	Inter-Rater		Consecutive	1.745							4.83689
Arnold	2010	Community-dwelling	18	DYNAMOMETER HIP EXT STANDING	adequate	+	0.925	0.81	0.97	Two way mixed model with absolute agreement	Inter-Rater		Consecutive	1.275							3.53412
Arnold	2010	Community-dwelling	18	DYNAMOMETER HIP FLEX SITTING	adequate	+	0.875	0.7	0.95	Two way mixed model with absolute agreement	Intra-Rater		Consecutive	1.395							3.86674
Arnold	2010	Community-dwelling	18	DYNAMOMETER HIP FLEX STANDING	adequate	+	0.875	0.7	0.95	Two way mixed model with absolute agreement	Intra-Rater		Consecutive	1.34							3.71429
Arnold	2010	Community-dwelling	18	DYNAMOMETER HIP ABD SUPINE	adequate	+	0.89	0.73	0.96	Two way mixed model with absolute agreement	Intra-Rater		Consecutive	0.975							2.70256
Arnold	2010	Community-dwelling	18	DYNAMOMETER HIP ABD STANDING	adequate	+	0.935	0.84	0.98	Two way mixed model with absolute agreement	Intra-Rater		Consecutive	1.05							2.91045
Arnold	2010	Community-dwelling	18	DYNAMOMETER KNEE EXT 45°	adequate	+	0.86	0.66	0.95	Two way mixed model with absolute agreement	Intra-Rater		Consecutive	1.73							4.79532
Arnold	2010	Community-dwelling	18	DYNAMOMETER DORSIFLEX SITTING	adequate	+	0.8	0.54	0.92	Two way mixed model with absolute agreement	Intra-Rater		Consecutive	1.195							3.31237
Arnold	2010	Community-dwelling	18	DYNAMOMETER HIP EXT STANDING	adequate	+	0.83	0.6	0.93	Two way mixed model with absolute agreement	Intra-Rater		Consecutive	1.79							4.96163
Bautmans	2011	Hospitalized and community-dwelling	81	GAIT SPEED	adequate	+	0.935	0.9	0.96	2.1	Inter-Rater		simultanious	0.065		5.7	-0.21914	0.18424	-0.0349		0.180171
Bautmans	2011	Hospitalized and community-dwelling	81	GAIT SPEED MEAN OF TWO	adequate	+	0.975	0.96	0.98	2.1	Inter-Rater		simultanious	0.045		4.4	-0.152696	0.122696	-0.03		0.124734
Bautmans	2011	Hospitalized and community-dwelling	81	GAIT SPEED	adequate	+	0.955	0.93	0.97	2.1	Intra-Rater		Consecutive	0.055		4.8	-0.203168	0.158368	-0.0448		0.152452
Bautmans	2011	Hospitalized and community-dwelling	32	GAIT SPEED MEAN OF TWO	adequate	+	0.99	0.98	0.99	2.1	Intra-Rater		Consecutive	0.035		3.5	-0.164164	0.124264	-0.0399		0.0970151
Bruyneel	2018	Hospitalized and community-dwelling	32	DYNAMOMETER HIP ABD STANDING	doubtful	+	0.98	0.95	0.99	2.1	Intra-Rater		1-3 h	0.09			-0.38	0.4	0.007		0.249467		25.2
Bruyneel	2018	Hospitalized and community-dwelling	32	DYNAMOMETER HIP ABD STANDING RFG	doubtful	+	0.93	0.87	0.97	2.1	Intra-Rater		1-3 h	1.24			-3.01	3.48	0.23		3.4371		44.3
Ford-Smith	2001	Community-dwelling	25	DYNAMOMETER HIP EXT SUPINE	doubtful	+	0.74	0.49	0.88	3.1	Intra-Rater		7 d
Ford-Smith	2001	Community-dwelling	25	DYNAMOMETER HIP FLEX SITTING	doubtful	+	0.91	0.81	0.96	3.1	Intra-Rater		7 d
Ford-Smith	2001	Community-dwelling	25	DYNAMOMETER KNEE EXT 90°	doubtful	+	0.9	0.79	0.95	3.1	Intra-Rater		7 d
Ford-Smith	2001	Community-dwelling	25	DYNAMOMETER KNEE FLEX	doubtful	+	0.85	0.65	0.93	3.1	Intra-Rater		7 d
Ford-Smith	2001	Community-dwelling	25	DYNAMOMETER PLANTARFLEX	doubtful	+	0.71	0.44	0.86	3.1	Intra-Rater		7 d
Ford-Smith	2001	Community-dwelling	25	DYNAMOMETER DORSIFLEX LYING	doubtful	+	0.84	0.67	0.93	3.1	Intra-Rater		7 d
Gafner	2017	Hospitalized and community-dwelling	76	DYNAMOMETER HIP ABD SIDELYING MAX	doubtful	+	0.94	0.87	0.97	2.1	Intra-Rater		1-3 h	0.12							0.332623		32
Gafner	2017	Hospitalized and community-dwelling	76	DYNAMOMETER HIP ABD SIDELYING RFG	doubtful	+	0.94	0.91	0.97	2.1	Intra-Rater		1-3 h	1.05							2.91045		51
Gafner	2017	Hospitalized and community-dwelling	76	DYNAMOMETER HIP ADD SIDELYING MAX	doubtful	+	0.9	0.84	0.95	2.1	Intra-Rater		1-3 h	0.17							0.471216		39
Gafner	2017	Hospitalized and community-dwelling	76	DYNAMOMETER HIP ADD SIDELYING RFG	doubtful	+	0.94	0.9	0.97	2.1	Intra-Rater		1-3 h	0.77							2.13433		48
Goldberg	2011	Community-dwelling	30	GAIT SPEED	very good	+	0.97	0.94	0.99	3.1	Intra-Rater		Consecutive	4.9	4.6						13.5821		12.7
Hars	2013	Community-dwelling	60	GAIT SPEED	adequate	+	0.84	0.69	0.92	2.1	Intra-Rater		1 h	4.5	4.3						12.4		11.8
Hars	2013	Hospital	60	GAIT SPEED	adequate	+	0.92	0.82	0.96	2.1	Intra-Rater		1 h	3.5	5.7						9.6		15.8
Hars	2013	Community-dwelling	60	GAIT SPEED FAST	adequate	+	0.9	0.8	0.95	2.1	Intra-Rater		1 h	3.9	2.7						10.8		7.5
Hars	2013	Hospital	60	GAIT SPEED FAST	adequate	+	0.94	0.84	0.98	2.1	Intra-Rater		1 h	3.8	4.8						10.5		13.4
Hars	2013	Community-dwelling	60	GAIT SPEED DUALTASK	adequate	+	0.85	0.7	0.92	2.1	Intra-Rater		1 h	5.6	5.9						15.5		16.3
Hars	2013	Hospital	60	GAIT SPEED DUALTASK	adequate	+	0.91	0.84	0.94	2.1	Intra-Rater		1 h	3.6	6.5						10		18.1
Hartmann	2009	Community-dwelling	23	GAIT SPEED	adequate	+	0.94	0.87	0.98	2.1	Inter-Rater		20min				-0.1	0.1		0.027
Hartmann	2009	Community-dwelling	23	GAIT SPEED DUALTASK	adequate	+	0.97	0.91	0.99	2.1	Inter-Rater		20min				-0.09	0.09		0.024
Hartmann	2009	Community-dwelling	23	GAIT SPEED FOAM	adequate	+	0.96	0.9	0.99	2.1	Inter-Rater		20min				-0.08	0.08		0.02
Hartmann	2009	Community-dwelling	23	GAIT SPEED FOAM DUALTASK	adequate	+	0.95	0.87	0.98	2.1	Inter-Rater		20min				-0.13	0.13		0.037
Hartmann	2009	Community-dwelling	23	GAIT SPEED	adequate	+	0.93	0.84	0.97	3.1	Intra-Rater		5-10d				-0.12	0.12		0.031
Hartmann	2009	Community-dwelling	23	GAIT SPEED DUALTASK	adequate	+	0.92	0.8	0.97	3.1	Intra-Rater		5-10d				-0.13	0.13		0.037
Hartmann	2009	Community-dwelling	23	GAIT SPEED FOAM	adequate	+	0.98	0.93	0.99	3.1	Intra-Rater		5-10d				-0.07	0.07		0.019
Hartmann	2009	Community-dwelling	23	GAIT SPEED FOAM DUALTASK	adequate	+	0.93	0.84	0.97	3.1	Intra-Rater		5-10d				-0.13	0.13		0.034
Hofheinz	2010	Community-dwelling	23	TUG FAST	inadequate	+	0.94	0.86	0.97	/	Intra-Rater		24h - 7d
Hofheinz	2010	Community-dwelling	23	TUG MAN FAST	inadequate	+	0.99	0.98	1	/	Intra-Rater		24h - 7d
Hofheinz	2010	Community-dwelling	23	TUG COG FAST	inadequate	+	0.94	0.86	0.97	/	Intra-Rater		24h - 7d
Holbein-Jenny	2005	Nursing home	27	BBS	adequate	+	0.88	0.75	0.94	1.1	Inter-Rater		simultanious						2.7
Holbein-Jenny	2005	Nursing home	27	FRT	adequate	+	0.98	0.96	0.99	1.1	Inter-Rater		simultanious						1.016
Holbein-Jenny	2005	Nursing home	27	BBS	adequate	+	0.77	0.56	0.89	1.1	Intra-Rater		7-14d						4.6
Holbein-Jenny	2005	Nursing home	27	FRT	adequate	+	0.75	0.52	0.88	1.1	Intra-Rater		7-14d						3.556
Katoh	2014	Community-dwelling	186	DYNAMOMETER KNEE EXT 90°	doubtful	+	0.955	0.94	0.966	1.1	Intra-Rater	3	Consecutive				-5.6	4.6	-0.5
Lee	2016	Community-dwelling	15	TUG FAST	adequate	+	0.887	0.675	0.962	3.3	Intra-Rater		1-10d	0.87							2.41
Lee	2016	Community-dwelling	15	TUG FAST 6M	adequate	+	0.95	0.85	0.983	3.3	Intra-Rater		1-10d	0.84							2.33
Lee	2016	Community-dwelling	15	TUG FAST 9M	adequate	+	0.96	0.881	0.986	3.3	Intra-Rater		1-10d	0.96							2.66
Marques	2016	Community-dwelling	28	BEST	doubtful	+	0.88	0.77	0.94	2.1	Inter-Rater		simultanious				-2.2	2	-0.1
Marques	2016	Community-dwelling	28	MINI BEST	doubtful	+	0.77	0.73	0.92	2.1	Inter-Rater		simultanious				-6.5	7.2	0.4
Marques	2016	Community-dwelling	28	BRIEF BEST	doubtful	+	0.71	0.5	0.84	2.1	Inter-Rater		simultanious				-4.2	3.7	-0.2
Marques	2016	Community-dwelling	28	BBS	doubtful	+	0.93	0.87	0.97	2.1	Inter-Rater		simultanious				-2.5	2.1	-0.2
Marques	2016	Community-dwelling	28	BEST	doubtful	+	0.5	0.15	0.73	2.1	Intra-Rater		48-72h	3.3			-4.6	3.2	-0.7		9		10.2
Marques	2016	Community-dwelling	28	MINI BEST	doubtful	+	0.77	0.55	0.88	2.1	Intra-Rater		48-72h	1.4			-10.6	6.9	-1.6		3.8		16.3
Marques	2016	Community-dwelling	28	BRIEF BEST	doubtful	+	0.73	0.49	0.86	2.1	Intra-Rater		48-72h	1.5			-4.2	3.3	-0.4		1.5		21.5
Marques	2016	Community-dwelling	28	BBS	doubtful	+	0.82	0.65	0.91	2.1	Intra-Rater		48-72h	1.7			-4.4	3.5	-0.4		4.6		8.6
Martinez	2016	Hospital	110	GAIT SPEED FAST	adequate	+	0.99	0.98	0.99	two-way random effects consistency model	Intra-Rater		Consecutive				-0.25	0.27	-0.04
Shumway-Cook	2000	Community-dwelling	30	TUG FAST	doubtful	+	0.98	0.96	0.88	3.3	Inter-Rater
Shumway-Cook	2000	Community-dwelling	30	TUG COG FAST	doubtful	+	0.99	0.98	1	3.3	Inter-Rater
Shumway-Cook	2000	Community-dwelling	30	TUG MAN FAST	doubtful	+	0.99	0.98	1	3.3	Inter-Rater
Smith	2016	Community-dwelling	12	TUG FAST	adequate	+	0.96	0.912	0.987	3.1	Intra-Rater		5consecutive d	0.08	0.85						0.221749
Smith	2016	Community-dwelling	12	TUG MAN FAST	adequate	+	0.916	0.821	0.971	3.1	Intra-Rater		5consecutive d	0.04	0.36						0.110874
Smith	2016	Community-dwelling	12	TUG COG FAST	adequate	+	0.987	0.971	0.947	3.1	Intra-Rater		5consecutive d	0.23	2						0.637527
Viveiro	2018	Nursing home	49	BBS	doubtful	+	0.993	0.988	0.996	2.1	Inter-Rater		simultanious				-3.624	3.824	0.1
Viveiro	2018	Nursing home	49	BEST	doubtful	+	0.994	0.989	0.997	2.1	Inter-Rater		simultanious				-7.648	7.248	-0.2
Viveiro	2018	Nursing home	49	MINI BEST	doubtful	+	0.992	0.986	0.996	2.1	Inter-Rater		simultanious				-2.652	2.052	-0.3
Viveiro	2018	Nursing home	49	BRIEF BEST	doubtful	+	0.993	0.987	0.996	2.1	Inter-Rater		simultanious				-1.98	1.94	-0.02
Viveiro	2018	Nursing home	37	BBS	doubtful	+	0.885	0.787	0.94	2.1	Intra-Rater		7-14d	3.8			-11.392	8.992	-1.2		10.5
Viveiro	2018	Nursing home	37	BEST	doubtful	+	0.944	0.893	0.971	2.1	Intra-Rater		7-14d	5.6	5.2		-16.984	13.984	-1.5		15.6		14.4
Viveiro	2018	Nursing home	37	MINI BEST	doubtful	+	0.934	0.856	0.968	2.1	Intra-Rater		7-14d	1.8			-6.484	4.884	-0.8		4.9
Viveiro	2018	Nursing home	37	BRIEF BEST	doubtful	+	0.939	0.884	0.968	2.1	Intra-Rater		7-14d	1.4	6		-4.216	4.016	-0.1		4		16.5
Wang-Hsu	2018	Community-dwelling	32	BEST	adequate	+	0.97	0.94	0.99	2.1	Inter-Rater		simultanious
Wang-Hsu	2018	Community-dwelling	70	BEST	adequate	+	0.93	0.89	0.96	2.1	Intra-Rater		7-14d	3	2.7					0.041	8.2	6.9	7.6	6.4
Yingyongyudha	2016	Community-dwelling	12	MINI BEST	doubtful	+	0.9	0.69	0.97	/	Intra-Rater		not mentionned
Yingyongyudha	2016	Community-dwelling	12	BEST	doubtful	+	0.85	0.56	0.95	/	Intra-Rater		not mentionned
Yingyongyudha	2016	Community-dwelling	12	TUG	doubtful	+	0.92	0.75	0.98	/	Intra-Rater		not mentionned

## Sheet: Suppl. Table 2, validity
Supplementary Table 2: Detailed Dataextraction sheet for the validity studies of all settings Abbreviations; AUC: area under the curve, AUC CI 95%: area under the curve confidence intervall 95%, COSMIN: COnsensus-based Standards for the selection of health Measurement Instruments, LR+: likelihood ratio for a positive test, LR-: likelihood ratio for a negative test, R+ CI 95%: likelihood ratio for…
					QUADAS-2							COSMIN		Population characterisitcs					For diagnostic accuracy
					Risk of Bias; 1: low,2:high,3:unclear, NA				Applicability concerns
Author	Year	Test	setting	Assessment of reference standard	Patient selection	Index Test	Reference Standard	Flow and timeing	Patient selection	Index test	Reference test	Criterion Validity criteria for good measurement properties	N analysed	age total group (mean)	Age total group (SD) in years	Gender n female	Gender % female	definition of the fallers	AUC	AUC CI 95%	cut off point fallers/non-fallers	<, >, ≤, ≥	Unit (s, m, …)	True Positives	False Negatives	True Negatives	False Positives	Sensitivity	Sensitiviry CI 95%	Specificity	Specificity CI 95%	LR+	LR+ CI 95%	LR-	LR- CI 95%
AbuSamah	2018	TUG	Community-dwelling	Prospective	3	3	3	1	1	1	1	?	305	67.55	5.5	171	56.1	1 ≥ faller	NA	NA	8	≥	s	68	13	72	150	0.8395	0.741-0.912	0.3243	26.3-39.0	1.24	1.09-1.42	0.49	0.29-0.84
AbuSamah	2018	TUG	Community-dwelling	Prospective	3	3	3	1	1	1	1	?	305	67.55	5.5	171	56.1	1 ≥ faller	NA	NA	9	≥	s	44	37	114	110	0.5432	NA	0.509	NA	1.11	0.87-1.41	0.9	0.69-1.18
AbuSamah	2018	TUG	Community-dwelling	Prospective	3	3	3	1	1	1	1	?	305	67.55	5.5	171	56.1	1 ≥ faller	NA	NA	10	≥	s	31	50	153	71	0.3827	NA	0.6847	NA	1.21	0.86-1.69	0.9	0.74-1.10
AbuSamah	2018	TUG	Community-dwelling	Prospective	3	3	3	1	1	1	1	?	305	67.55	5.5	171	56.1	1 ≥ faller	NA	NA	11	≥	s	19	62	178	46	0.2346	NA	0.7928	NA	1.13	0.71-1.83	0.97	0.84-1.11
Alexandre	2012	TUG	Community-dwelling	Prospective	3	3	3	1	1	1	1	-	60	66.4613	4.8577	31	51.6	1 ≥ faller	0.68	0.54-0.83	12.47	≥	s	14	5	27	14	0.737	NA	0.658	NA	2.16	1.31-3.57	0.4	0.18-0.88
Alexandre	2012	TUG	Community-dwelling	Prospective	3	3	3	1	1	1	1	?	60	66.4613	4.8577	31	51.6	1 ≥ faller	NA	NA	13	≥	s	10	9	29	12	0.526	NA	0.707	NA	1.8	0.95-3.41	0.67	0.40-1.12
Applebaum	2017	TUG	Nursing home	Prospective	3	3	3	1	1	1	1	-	53	91	4	4	8	1 ≥ faller	0.57	0.4-0.73	14.2	not stated	s	31	1	3	18	0.97	NA	0.15	NA	1.14118	NA	0.2	NA
Arnold	2007	TUG FAST	Community-dwelling	Retrospective	1	3	3	1	1	1	1	-	105	74.4	6.2	77	73	1 ≥ faller	0.58	0.47-0.70	10	not stated	s	35	13	20	37	0.73	NA	0.35	NA	1.12308	NA	0.771429	.
Arnold	2007	TUG FAST	Community-dwelling	Retrospective	1	3	3	1	1	1	1	-	105	74.4	6.2	77	73	1 ≥ faller	0.58	0.47-0.70	11	not stated	s	32	16	31	26	0.67	NA	0.55	NA	1.48889	NA	0.6
Arnold	2007	TUG FAST	Community-dwelling	Retrospective	1	3	3	1	1	1	1	-	105	74.4	6.2	77	73	1 ≥ faller	0.58	0.47-0.70	12	not stated	s	21	27	40	17	0.44	NA	0.7	NA	1.46667	NA	0.8
Arnold	2007	TUG FAST	Community-dwelling	Retrospective	1	3	3	1	1	1	1	-	105	74.4	6.2	77	73	1 ≥ faller	0.58	0.47-0.70	13	not stated	s	16	32	42	15	0.33	NA	0.74	NA	1.26923	NA	0.905405
Arnold	2007	TUG FAST	Community-dwelling	Retrospective	1	3	3	1	1	1	1	-	105	74.4	6.2	77	73	1 ≥ faller	0.58	0.47-0.70	14	not stated	s	13	35	44	13	0.27	NA	0.77	NA	1.17391	NA	0.948052
Chantanachai	2014	TUG	Community-dwelling	Retrospective	3	3	3	1	1	1	1	-	161	70.6956	6.4765	130	81.37	1 ≥ faller	0.62	0.59-0.76	10.5	unclear	s	37	13	64	47	0.74	NA	0.58	NA	3.87	NA	0.451	NA
Chow	2018	TUG	Hospitalized	Prospective	2	1	3	1	1	1	3	-	192	74.4	7.4	111	81	1 ≥ faller	0.54	NA	12	≥	s	36	15	40	101	0.706	NA	0.284	NA	0.98	NA	1.04	NA
Criter	2016	TUG	Community-dwelling	Retrospective	3	3	3	1	1	3	1	?	30	77.2	11.2	21	70	1 ≥ faller	NA	NA	13	>	s	6	6	15	3	0.5	NA	0.833	NA	3	NA	0.6	NA
Criter	2016	TUG	Community-dwelling	Retrospective	3	3	3	1	1	3	1	?	30	77.2	11.2	21	70	1 ≥ faller	NA	NA	12	>	s	10	2	11	7	0.833	NA	0.611	NA	2.14139	NA	0.273322	NA
Criter	2017	TUG	Community-dwelling	Retrospective	3	3	3	1	1	1	1	-	63	72.925	7.4443	20	55.5	1 ≥ faller	0.62	NA	12	≥	s	15	10	7	4	0.6	NA	0.636	NA	1.65	NA	0.63	NA
Criter	2017	TUG	Community-dwelling	Retrospective	3	3	3	1	1	1	1	-	63	70.3593	5.3763	18	66.6	1 ≥ faller	0.68	NA	12	≥	s	2	5	16	4	0.286	NA	0.8	NA	1.43	NA	0.89	NA
Gafner	2018	GRIP STRENGTH	Hospitalized and community-dwelling	Retrospective	1	3	3	1	1	1	1	-	56	82	6.6	38	63.3	1 ≥ faller	0.649	0.497-0.802	NA	NA	NA	NA	NA	NA	NA	NA	NA	NA	NA	NA	NA	NA	NA
Gafner	2018	HIP STRENGTH ABDUCTORS	Hospitalized and community-dwelling	Retrospective	1	3	3	1	1	1	1	+	56	82	6.6	38	63.3	1 ≥ faller	0.825	0.712-0.938	1.1	≤	N/kg	29	3	16	12	0.906	0.75-0.98	0.57	0.37-0.755	2.1	1.4-3.3	0.2	0.1-0.05
Gafner	2018	HIP STRENGTH ABDUCTORS RFG	Hospitalized and community-dwelling	Retrospective	1	3	3	1	1	1	1	+	56	82	6.6	38	63.3	1 ≥ faller	0.787	0.667-0.906	8.5	≤	N/kg/s	29	3	13	15	0.906	0.75-0.99	0.464	0.275-0.661	1.7	1.2-2.4	0.2	0.1-0.6
Gafner	2018	HIP STRENGTH ADDUCTORS	Hospitalized and community-dwelling	Retrospective	1	3	3	1	1	1	1	+	56	82	6.6	38	63.3	1 ≥ faller	0.773	0.648-0.897	1.3	≤	N/kg	NA	NA	NA	NA	0.906	NA	0.428	NA	1.6	NA	0.2	NA
Gafner	2018	HIP STRENGTH ADDUCTORS RFG	Hospitalized and community-dwelling	Retrospective	1	3	3	1	1	1	1	+	56	82	6.6	38	63.3	1 ≥ faller	0.706	0.568-0.844	6.2	≤	N/kg/s	NA	NA	NA	NA	0.906	NA	0.428	NA	1.6	NA	0.2	NA
Gafner	2018	HIP STRENGTH EXTENSORS	Hospitalized and community-dwelling	Retrospective	1	3	3	1	1	1	1	-	56	82	6.6	38	63.3	1 ≥ faller	0.61	0.460-0.761	1.7	≤	N/kg	NA	NA	NA	NA	0.9	NA	0.185	NA	1.1	NA	0.5	NA
Gafner	2018	HIP STRENGTH EXTENSORS RFG	Hospitalized and community-dwelling	Retrospective	1	3	3	1	1	1	1	-	56	82	6.6	38	63.3	1 ≥ faller	0.558	0.404-0.712	10.7	≤	N/kg/s	NA	NA	NA	NA	0.9	NA	0.148	NA	1.1	NA	0.7	NA
Gafner	2018	HIP STRENGTH EXTERNAL ROTATORS	Hospitalized and community-dwelling	Retrospective	1	3	3	1	1	1	1	+	56	82	6.6	38	63.3	1 ≥ faller	0.741	0.610-0.871	0.9	≤	N/kg	NA	NA	NA	NA	0.9	NA	0.321	NA	1.3	NA	0.3	NA
Gafner	2018	HIP STRENGTH EXTERNAL ROTATORS RFG	Hospitalized and community-dwelling	Retrospective	1	3	3	1	1	1	1	-	56	82	6.6	38	63.3	1 ≥ faller	0.651	0.506-0.797	5.7	≤	N/kg/s	NA	NA	NA	NA	0.9	NA	0.179	NA	1.1	NA	0.6	NA
Gafner	2018	HIP STRENGTH FLEXORS	Hospitalized and community-dwelling	Retrospective	1	3	3	1	1	1	1	+	56	82	6.6	38	63.3	1 ≥ faller	0.755	0.628-0.882	1.9	≤	N/kg	NA	NA	NA	NA	0.906	NA	0.5	NA	1.8	NA	0.2	NA
Gafner	2018	HIP STRENGTH FLEXORS RFG	Hospitalized and community-dwelling	Retrospective	1	3	3	1	1	1	1	-	56	82	6.6	38	63.3	1 ≥ faller	0.678	0.536-0.820	14.5	≤	N/kg/s	NA	NA	NA	NA	0.906	NA	0.321	NA	1.3	NA	0.3	NA
Gafner	2018	HIP STRENGTH INTERNAL ROTATORS	Hospitalized and community-dwelling	Retrospective	1	3	3	1	1	1	1	-	56	82	6.6	38	63.3	1 ≥ faller	0.576	0.422-0.730	1.4	≤	N/kg	NA	NA	NA	NA	0.9	NA	0.25	NA	1.2	NA	0.4	NA
Gafner	2018	HIP STRENGTH INTERNAL ROTATORS RFG	Hospitalized and community-dwelling	Retrospective	1	3	3	1	1	1	1	-	56	82	6.6	38	63.3	1 ≥ faller	0.617	0.467-0.766	6.4	≤	N/kg/s	NA	NA	NA	NA	0.9	NA	0.25	NA	1.2	NA	0.4	NA
Greene	2010	BBS	Community-dwelling	Retrospective	3	2	3	1	1	1	1	-	349	72.4	7.4	246	70.5	1 ≥ faller	0.69	NA	not mentionned	not mentionned	s	120	87	91	51	0.578	NA	0.642	NA	1.61453	NA	0.657321	NA
Greene	2010	TUG	Community-dwelling	Retrospective	3	2	3	1	1	1	1	-	349	72.4	7.4	246	70.5	1 ≥ faller	0.66	NA	not mentionned	not mentionned	s	120	87	92	50	0.58	NA	0.648	NA	1.64773	NA	0.648148	NA
Hars	2018	SIMPLIFIED POMA	Hospitalized	Retrospective	1	3	1	1	1	1	1	-	524	85	6.9	545	67.5	1 ≥ faller	0.58	NA	2	≥	points	283	117	57	67	0.71	NA	0.46	NA	1.31403	NA	0.63587	NA
Hars	2018	SPPB	Hospitalized	Retrospective	1	3	1	1	1	1	1	-	678	85	6.9	545	67.5	1 ≥ faller	0.57	NA	5	<	points	357	167	71	83	0.68	NA	0.46	NA	1.26169	NA	0.692831	NA
Hars	2018	TUG	Hospitalized	Retrospective	1	3	1	1	1	1	1	-	525	85	6.9	545	67.5	1 ≥ faller	0.55	NA	29.5	>	s	164	234	88	39	0.41	NA	0.69	NA	1.33513	NA	0.852087	NA
Hofheinz	2016	TUG COG FAST	Community-dwelling	Prospective	1	3	3	1	1	1	1	-	113	72.2	6.8	94	78	1 ≥ faller	0.65	0.55-0.76	8.8	≤	s	31	6	34	42	0.84	0.72-0.96	0.45	0.34-0.55	1.52727	NA	0.355556	NA
Hofheinz	2016	TUG COG FAST	Community-dwelling	Prospective	1	3	3	1	1	1	1	-	113	72.2	6.8	94	78	1 ≥ faller	0.65	0.55-0.76	9	≤	s	26	11	39	37	0.7	0.56-0.85	0.51	0.40-0.61	1.42857	NA	0.588235	NA
Hofheinz	2016	TUG COG FAST	Community-dwelling	Prospective	1	3	3	1	1	1	1	-	113	72.2	6.8	94	78	1 ≥ faller	0.65	0.55-0.76	9.4	≤	s	22	15	41	35	0.59	0.44-0.75	0.54	0.43-0.65	1.28261	NA	0.759259	NA
Hofheinz	2016	TUG COG FAST	Community-dwelling	Prospective	1	3	3	1	1	1	1	-	113	72.2	6.8	94	78	1 ≥ faller	0.65	0.55-0.76	9.9	≤	s	21	16	53	23	0.57	0.41-0.73	0.7	0.60-0.8	1.9	NA	0.614286	NA
Hofheinz	2016	TUG COG FAST	Community-dwelling	Prospective	1	3	3	1	1	1	1	-	113	72.2	6.8	94	78	1 ≥ faller	0.65	0.55-0.76	10.3	≤	s	18	19	59	17	0.49	0.33-0.65	0.77	0.68-0.86	2.13043	NA	0.662338	NA
Ibrahim	2017	TUG	Community-dwelling	Retrospective	3	2	3	1	1	1	1	-	1086	69.6	5.6	553	50.9	1 ≥ faller	0.57	0.52-0.62	11.18	≥	s	98	63	488	437	0.608696	NA	0.527568	NA	1.28843	NA	0.741714	NA
Kojima	2015	TUG	Community-dwelling	Retrospective	3	2	3	1	1	1	1	-	259	72.6	5.9	164	63.3	1 ≥ faller	0.58	0.49-0.67	12.6	≥	s	18	41	179	21	0.305	NA	0.895	NA	2.90476	NA	0.776536	NA
Marques	2016	BBS	Community-dwelling	Retrospective	3	3	3	1	1	1	1	+	122	75.9	8.9	86	70.5	1 ≥ faller	0.76	0.66-0.86	48.5	not stated	points	24	10	67	21	0.71	NA	0.76	NA	2.92	NA	0.39	NA
Marques	2016	BEST	Community-dwelling	Retrospective	3	3	3	1	1	1	1	+	122	75.9	8.9	86	70.5	1 ≥ faller	0.78	0.68-0.87	82	not stated	points	25	9	63	25	0.74	NA	0.72	NA	2.59	NA	0.37	NA
Marques	2016	BRIEF BEST	Community-dwelling	Retrospective	3	3	3	1	1	1	1	+	122	75.9	8.9	86	70.5	1 ≥ faller	0.76	0.66-0.86	12.5	not stated	points	25	9	62	26	0.74	NA	0.71	NA	2.49	NA	0.38	NA
Marques	2016	MINI BEST	Community-dwelling	Retrospective	3	3	3	1	1	1	1	+	122	75.9	8.9	86	70.5	1 ≥ faller	0.71	0.60-0.82	19.5	not stated	points	25	9	59	29	0.74	NA	0.67	NA	2.23	NA	0.4	NA
Middleton	2016	GAIT SPEED	Community-dwelling	Retrospective	3	3	3	1	1	1	1	-	217	82	65-93	153	70.5	1 ≥ faller	0.69	0.62- 0.76	0.76	<	m/s	70	37	78	32	0.654	NA	0.709	NA	2.25	NA	0.49	NA
Middleton	2016	GAIT SPEED MAX	Community-dwelling	Retrospective	3	3	3	1	1	1	1	+	217	83	65-94	153	70.5	1 ≥ faller	0.71	0.64-0.77	1.13	<	m/s	70	37	78	32	0.766	NA	0.6	NA	1.92	NA	0.39	NA
Muir	2008	BBS	Community-dwelling	Prospective	3	3	3	1	1	1	1	-	187	79.47	5.83	65	35	1 ≥ faller	0.59	NA	45	≤	points	20	60	70	37	0.25	0.16-0.36	0.87	0.79-0.92	1.92308	NA	0.862069	NA
Muir	2008	BBS	Community-dwelling	Prospective	3	3	3	1	1	1	1	-	187	79.47	5.83	65	35	1 ≥ faller	0.59	NA	54	≤	points	49	31	34	73	0.61	0.50-0.72	0.53	0.43-0.63	1.29787	NA	0.735849	NA
Murphy	2003	FRT	Community-dwelling	Prospective	3	3	3	1	1	1	1	?	45	73.2	7.9	33	73.3	1 ≥ faller	NA	NA	20.32	not stated	cm	8	3	30	4	0.73	NA	0.88	NA	6.08333	NA	0.306818	NA
Murphy	2003	POMA BALANCE	Community-dwelling	Prospective	3	3	3	1	1	1	1	?	45	73.2	7.9	33	73.3	1 ≥ faller	NA	NA	12	not stated	points (on 12/16)	6	5	33	1	0.55	NA	0.97	NA	18.3333	NA	0.463918	NA
Rose	2002	TUG FAST	Community-dwelling	Retrospective	3	2	3	1	1	1	1	?	134	78.1	6.5	112	83.6	non-faller = 0 fall, faller ≥2 falls	NA	NA	10	≥	s	45	18	63	8	0.71	NA	0.89	NA	6.45455	NA	0.325843	NA
Rose	2002	TUG-8FT FAST	Community-dwelling	Retrospective	3	2	3	1	1	1	1	?	134	78.1	6.5	112	83.6	non-faller = 0 fall, faller ≥2 falls	NA	NA	8.5	≥	s	49	14	61	10	0.78	NA	0.86	NA	5.57143	NA	0.255814	NA
Santos	2011	BBS	Community-dwelling	Retrospective	3	3	3	1	1	1	1	?	91	68.05	7.1	72	79.2	not described (≥1 faller)	NA	NA	45	≤	points	0	20	71	0	0	NA	1	NA	1	NA	0	NA
Santos	2011	BBS	Community-dwelling	Retrospective	3	3	3	1	1	1	1	?	91	68.05	7.1	72	79.2	1 ≥ faller	NA	NA	47	≤	points	0	20	71	0	0	NA	1	NA	1	NA	0	NA
Santos	2011	BBS	Community-dwelling	Retrospective	3	3	3	1	1	1	1	?	91	68.05	7.1	72	79.2	1 ≥ faller	NA	NA	49	≤	points	1	19	70	1	0.05	NA	0.99	NA	1.04	NA	0.2	NA
Santos	2011	BBS	Community-dwelling	Retrospective	3	3	3	1	1	1	1	?	91	68.05	7.1	72	79.2	1 ≥ faller	NA	NA	51	≤	points	2	18	67	4	0.1	NA	0.94	NA	1.04	NA	0.6	NA
Santos	2011	BBS	Community-dwelling	Retrospective	3	3	3	1	1	1	1	?	91	68.05	7.1	72	79.2	1 ≥ faller	NA	NA	53	≤	points	3	17	59	12	0.15	NA	0.83	NA	0.88	NA	1.02	NA
Shimada	2009	FRT	Community-dwelling	Retrospective	3	3	3	1	1	1	1	?	455	80.5	7.2	310	68.1	1 ≥ faller	NA	NA	18	≤	cm	47	52	210	146	0.47	NA	0.59	NA	1.14634	NA	0.898305	NA
Shimada	2009	GAIT SPEED	Community-dwelling	Retrospective	3	3	3	1	1	1	1	?	455	80.5	7.2	310	68.1	1 ≥ faller	NA	NA	0.7	≤	m/s	55	44	210	146	0.56	NA	0.59	NA	1.36585	NA	0.745763	NA
Shimada	2009	GAIT SPEED MAX	Community-dwelling	Retrospective	3	3	3	1	1	1	1	?	455	80.5	7.2	310	68.1	1 ≥ faller	NA	NA	1	≤	m/s	57	42	206	150	0.58	NA	0.58	NA	1.38095	NA	0.724138	NA
Shimada	2009	GRIP STRENGTH	Community-dwelling	Retrospective	3	3	3	1	1	1	1	?	455	80.5	7.2	310	68.1	1 ≥ faller	NA	NA	17	≤	kg	54	45	196	160	0.55	NA	0.55	NA	1.22222	NA	0.818182	NA
Shimada	2009	ONE LEG STANCE	Community-dwelling	Retrospective	3	3	3	1	1	1	1	?	455	80.5	7.2	310	68.1	1 ≥ faller	NA	NA	3	≤	s	50	49	217	139	0.51	NA	0.61	NA	1.30769	NA	0.803279	NA
Shimada	2009	TUG	Community-dwelling	Retrospective	3	3	3	1	1	1	1	?	455	80.5	7.2	310	68.1	1 ≥ faller	NA	NA	16	≥	s	52	47	224	132	0.53	NA	0.63	NA	1.43243	NA	0.746032	NA
Shumway-Cook	2000	TUG COG FAST	Community-dwelling	Retrospective	3	2	1	1	1	1	1	?	30	82.3	7.1936	18	60	faller ≥ 2 fall	NA	NA	14.5	≥	s	13	2	14	1	0.86	NA	0.933333	NA	12.9	NA	0.15
Shumway-Cook	2000	TUG FAST	Community-dwelling	Retrospective	3	2	1	1	1	1	1	?	30	82.3	7.1936	18	60	faller ≥ 2 fall, non-faller = 0falls	NA	NA	13.5	≥	s	12	3	15	0	0.8	NA	1	NA	ERRER as Sp =1	NA	0.2
Shumway-Cook	2000	TUG MAN FAST	Community-dwelling	Retrospective	3	2	1	1	1	1	1	?	25	82.3	7.1936	18	60	faller ≥ 2 fall, non-faller = 0falls	NA	NA	15	≥	s	12	3	14	1	0.8	NA	0.933333	NA	12	NA	0.214286
Trueblood	2001	POMA BALANCE	Community-dwelling	Prospective	3	1	1	1	1	1	1	?	180	77.9	7.26	143	79.4	1 ≥ faller	NA	NA	12	not stated	points	6	24	143	7	0.21	NA	0.95	NA	4.2	NA	0.831579	NA
Trueblood	2001	POMA GAIT	Community-dwelling	Prospective	3	1	1	1	1	1	1	?	180	77.9	7.26	143	79.4	1 ≥ faller	NA	NA	8	not stated	points	7	23	137	13	0.24	NA	0.91	NA	2.66667	NA	0.835165	NA
Trueblood	2001	TUG	Community-dwelling	Prospective	3	1	1	1	1	1	1	?	180	77.9	7.26	143	79.4	1 ≥ faller	NA	NA	20	not stated	s	3	27	143	7	0.1	NA	0.95	NA	2	NA	0.947368	NA
Viveiro	2018	BBS	Nursing home	Retrospective	1	3	3	1	1	1	1	+	49	77.8	7.2	30	61.2	1 ≥ faller	0.762	0.762-0.897	48	not stated	points	10	8	29	2	0.548	0.360-0.548	0.944	0.727-0.998	9.871	1.431-68.097	0.478	0.319-0.716
Viveiro	2018	BEST	Nursing home	Retrospective	1	3	3	1	1	1	1	+	49	77.8	7.2	30	61.2	1 ≥ faller	0.749	0.612-0.886	57	not stated	points	11	7	26	5	0.613	0.422-0.782	0.833	0.586-0.964	3.677	1.260-10.720	0.464	0.285-0.757
Viveiro	2018	BRIEF BEST	Nursing home	Retrospective	1	3	3	1	1	1	1	+	49	77.8	7.2	30	61.2	1 ≥ faller	0.748	0.611-0.885	10	not stated	points	10	8	29	2	0.581	0.391-0.754	0.944	0.727-0.998	10.452	1.519-71.869	0.444	0.289-0.681
Viveiro	2018	MINI BEST	Nursing home	Retrospective	1	3	3	1	1	1	1	+	49	77.8	7.2	30	61.2	1 ≥ faller	0.712	0.565-0.860	10	not stated	points	13	5	24	7	0.709	0.519-0.857	0.778	0.524-0.936	3.193	1.307-7.801	0.373	0.204-0.682
Yingyongyudha	2016	BBS	Community-dwelling	Retrospective	3	3	1	1	1	1	1	-	200	70.25	7.0369	126	63	1 ≥ faller	0.69	NA	51	not stated	points	77	23	42	58	0.77	0.57-0.85	0.42	0.38-0.57	1.32759		0.547619
Yingyongyudha	2016	BEST	Community-dwelling	Retrospective	3	3	1	1	1	1	1	+	200	70.25	7.0369	126	63	1 ≥ faller	0.74	NA	66	not stated	points	76	24	50	50	0.76	0.67-0.83	0.5	0.40-0.60	1.52		0.48
Yingyongyudha	2016	MINI BEST	Community-dwelling	Retrospective	3	3	1	1	1	1	1	+	200	70.25	7.0369	126	63	1 ≥ faller	0.84	NA	16	not stated	points	85	15	75	25	0.85	0.77-0.9	0.75	0.66-0.83	3.4		0.2
Yingyongyudha	2016	TUG	Community-dwelling	Retrospective	3	3	1	1	1	1	1	-	200	70.25	7.0369	126	63	1 ≥ faller	0.32	NA	8	not stated	s	40	60	34	66	0.4	0.31-0.49	0.34	0.26-0.44	0.606061		1.76471
